# Supplementary material for: Development, validation and initial evaluation of patient-decision aid (SUI-PDA©) for women considering stress urinary incontinence surgery
Source: Springer Nature journal article supplement (doi:10.1007/s00192-019-04047-z), 2019-08-03
Supplement: MOESM1 [file 17036678]

## My difficulty in making this choice

A. Which surgical option do you prefer? Please check  one and indicate your 2<sup>nd</sup>, 3<sup>rd</sup> and last option.

- Mesh Tape**
- Colposuspension**
- Autologous Fascial Sling**
- Bulking Agent Injection**
- Unsure**

B. Considering the option you prefer, please answer the following questions:

|                                                                                                 | <b>Strongly Agree</b><br>[0] | <b>Agree</b><br>[1]      | <b>Neither Agree Or Disagree</b><br>[2] | <b>Disagree</b><br>[3]   | <b>Strongly Disagree</b><br>[4] |
|-------------------------------------------------------------------------------------------------|------------------------------|--------------------------|-----------------------------------------|--------------------------|---------------------------------|
| 1. I know which options are available to me.                                                    | <input type="checkbox"/>     | <input type="checkbox"/> | <input type="checkbox"/>                | <input type="checkbox"/> | <input type="checkbox"/>        |
| 2. I know the benefits of each option.                                                          | <input type="checkbox"/>     | <input type="checkbox"/> | <input type="checkbox"/>                | <input type="checkbox"/> | <input type="checkbox"/>        |
| 3. I know the risks and side effects of each option.                                            | <input type="checkbox"/>     | <input type="checkbox"/> | <input type="checkbox"/>                | <input type="checkbox"/> | <input type="checkbox"/>        |
| 4. I am clear about which benefits matter most to me.                                           | <input type="checkbox"/>     | <input type="checkbox"/> | <input type="checkbox"/>                | <input type="checkbox"/> | <input type="checkbox"/>        |
| 5. I am clear about which risks & side effects matter most.                                     | <input type="checkbox"/>     | <input type="checkbox"/> | <input type="checkbox"/>                | <input type="checkbox"/> | <input type="checkbox"/>        |
| 6. I am clear about which is more important to me (the benefits or the risks and side effects). | <input type="checkbox"/>     | <input type="checkbox"/> | <input type="checkbox"/>                | <input type="checkbox"/> | <input type="checkbox"/>        |
| 7. I have enough support from others to make a choice.                                          | <input type="checkbox"/>     | <input type="checkbox"/> | <input type="checkbox"/>                | <input type="checkbox"/> | <input type="checkbox"/>        |
| 8. I am choosing without pressure from others.                                                  | <input type="checkbox"/>     | <input type="checkbox"/> | <input type="checkbox"/>                | <input type="checkbox"/> | <input type="checkbox"/>        |
| 9. I have enough advice to make a choice.                                                       | <input type="checkbox"/>     | <input type="checkbox"/> | <input type="checkbox"/>                | <input type="checkbox"/> | <input type="checkbox"/>        |
| 10. I am clear about the best choice for me.                                                    | <input type="checkbox"/>     | <input type="checkbox"/> | <input type="checkbox"/>                | <input type="checkbox"/> | <input type="checkbox"/>        |
| 11. I feel sure about what to choose.                                                           | <input type="checkbox"/>     | <input type="checkbox"/> | <input type="checkbox"/>                | <input type="checkbox"/> | <input type="checkbox"/>        |
| 12. This decision is easy for me to make.                                                       | <input type="checkbox"/>     | <input type="checkbox"/> | <input type="checkbox"/>                | <input type="checkbox"/> | <input type="checkbox"/>        |
| 13. I feel I have made an informed choice.                                                      | <input type="checkbox"/>     | <input type="checkbox"/> | <input type="checkbox"/>                | <input type="checkbox"/> | <input type="checkbox"/>        |
| 14. My decision shows what is important to me.                                                  | <input type="checkbox"/>     | <input type="checkbox"/> | <input type="checkbox"/>                | <input type="checkbox"/> | <input type="checkbox"/>        |
| 15. I expect to stick with my decision.                                                         | <input type="checkbox"/>     | <input type="checkbox"/> | <input type="checkbox"/>                | <input type="checkbox"/> | <input type="checkbox"/>        |
| 16. I am satisfied with my decision.                                                            | <input type="checkbox"/>     | <input type="checkbox"/> | <input type="checkbox"/>                | <input type="checkbox"/> | <input type="checkbox"/>        |

Please provide any further information here.
